# Supplementary material
Source: PubMed Central journal article supplement (PMC3271813)

**Web Figure 1:** Forest plot of secondary prevention randomized trials of statin initiation and risk of recurrent MI or CHD (HR: hazard ratio comparing treated with control)

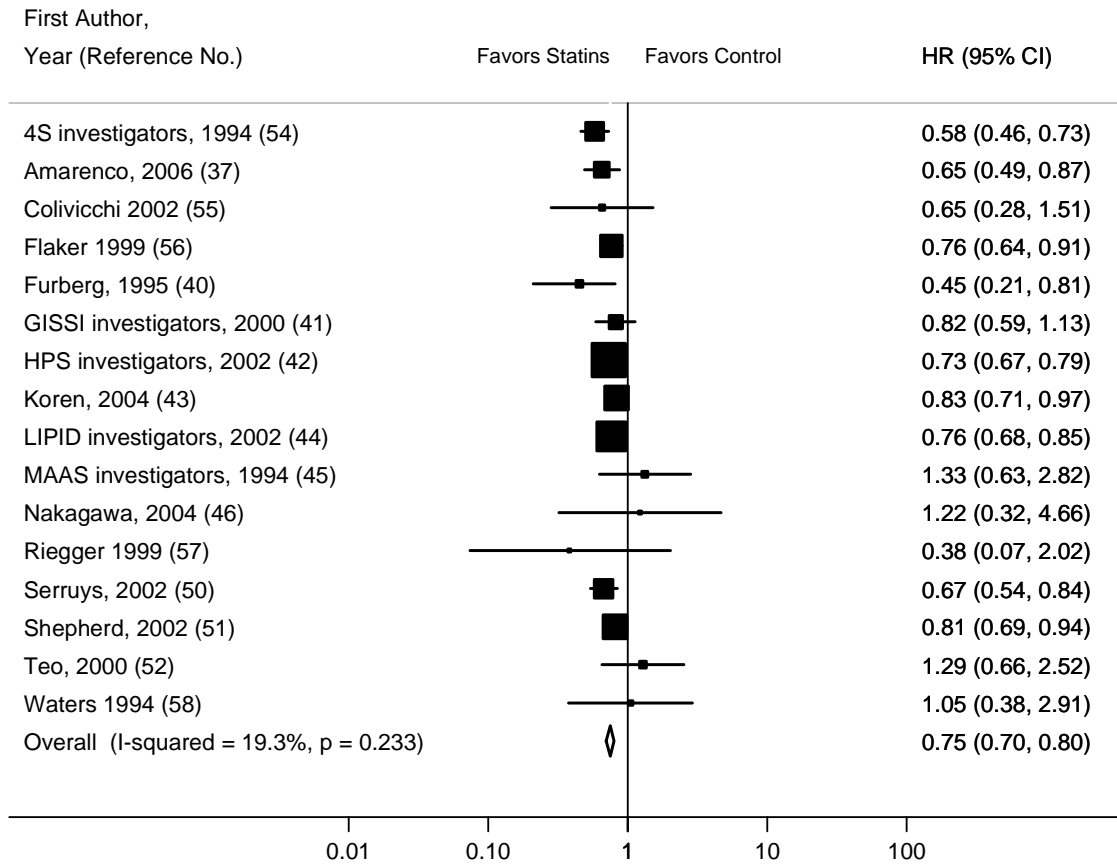

**Web Figure 2:** Forest plot of secondary prevention observational studies of statins and risk of death comparing prevalent users and non-users after adjustment for confounders, restricted to studies that reported both crude and adjusted hazard ratios (HR: hazard ratio comparing users with non-users)

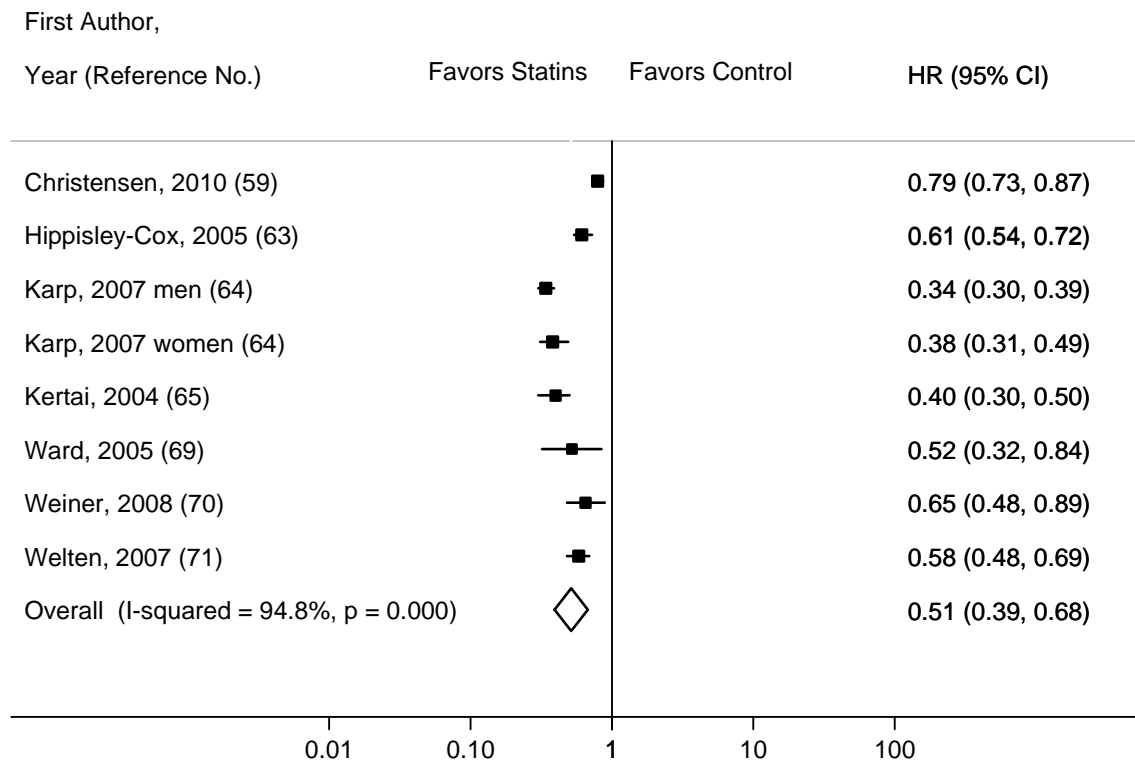

**Web Figure 3:** Forest plot of primary prevention randomized trials of statin initiation and risk of non-fatal MI or death from CHD (HR: hazard ratio comparing treated with control)

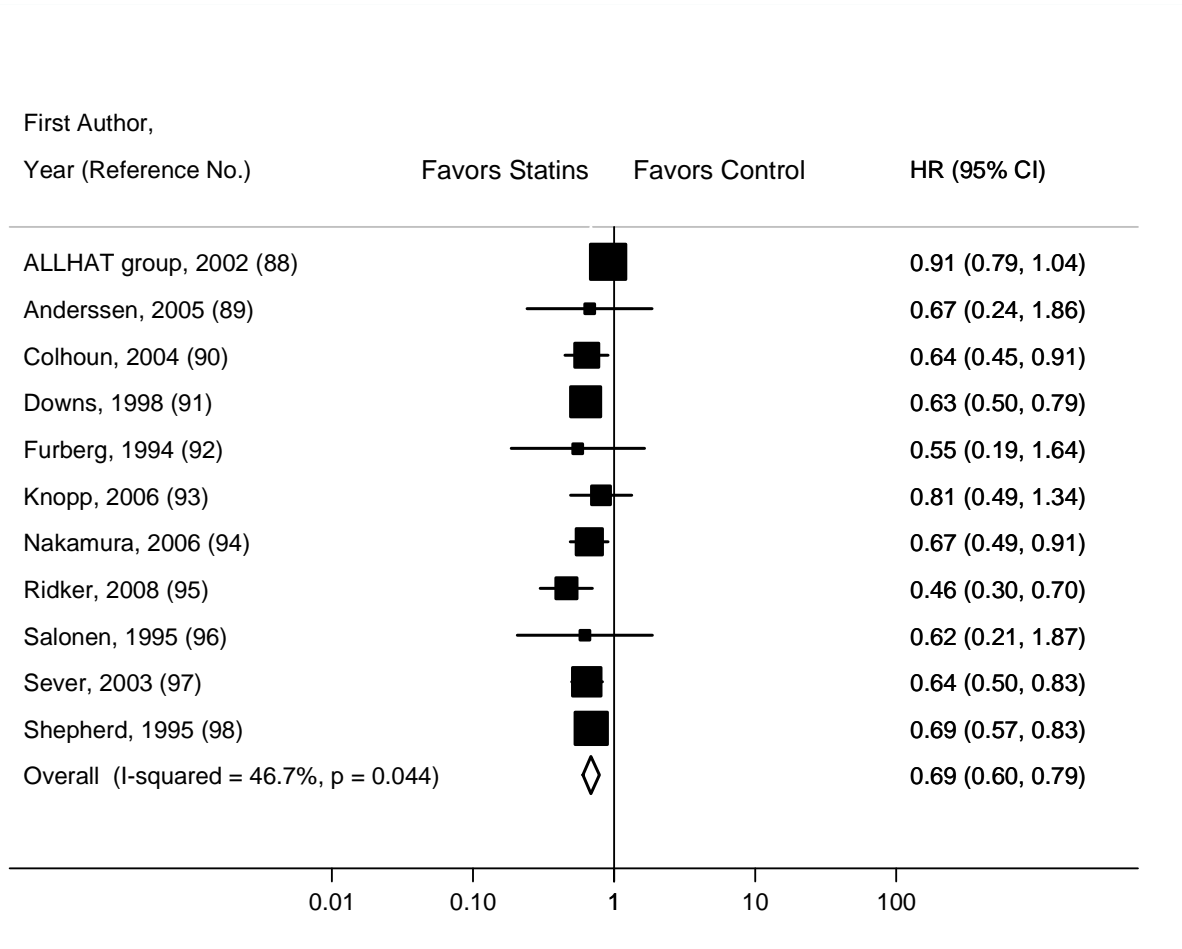

**Web Figure 4:** Funnel plots of randomized trials of primary (A) and secondary prevention (B); and secondary prevention observational studies comparing prevalent users with non-users (C) and secondary prevention observational studies comparing a combination of prevalent and incident users with non users (D). The outcome was CHD or MI in primary prevention and all-cause mortality in secondary prevention studies. SE: Standard Error

(A)

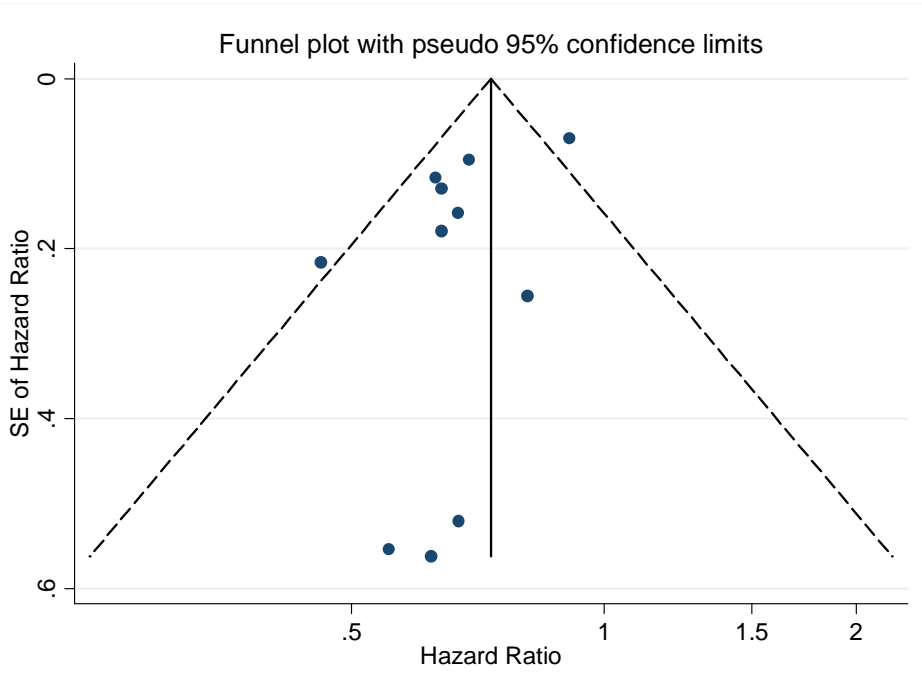

(B)

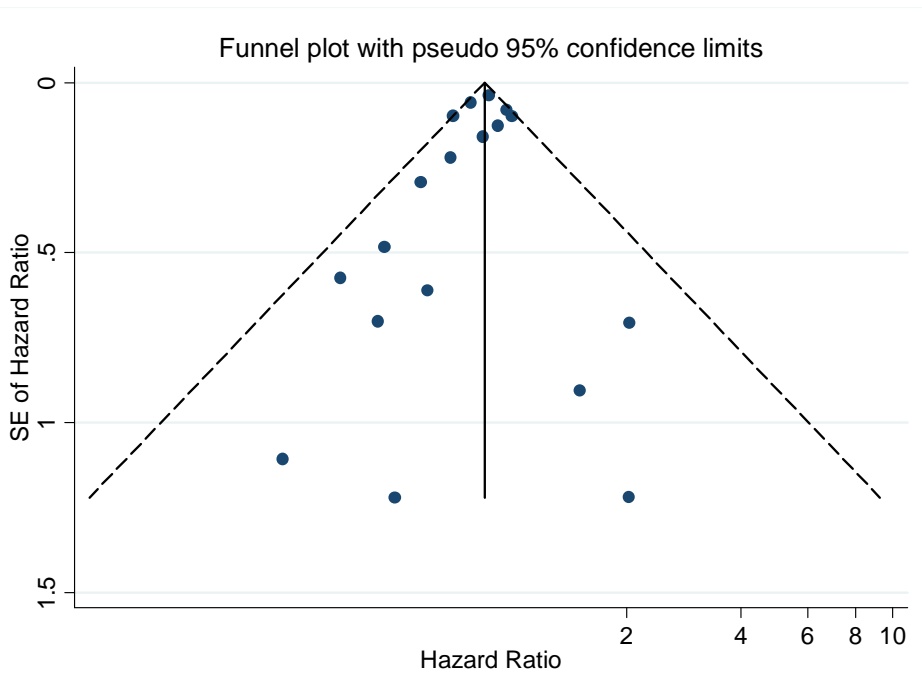

(C)

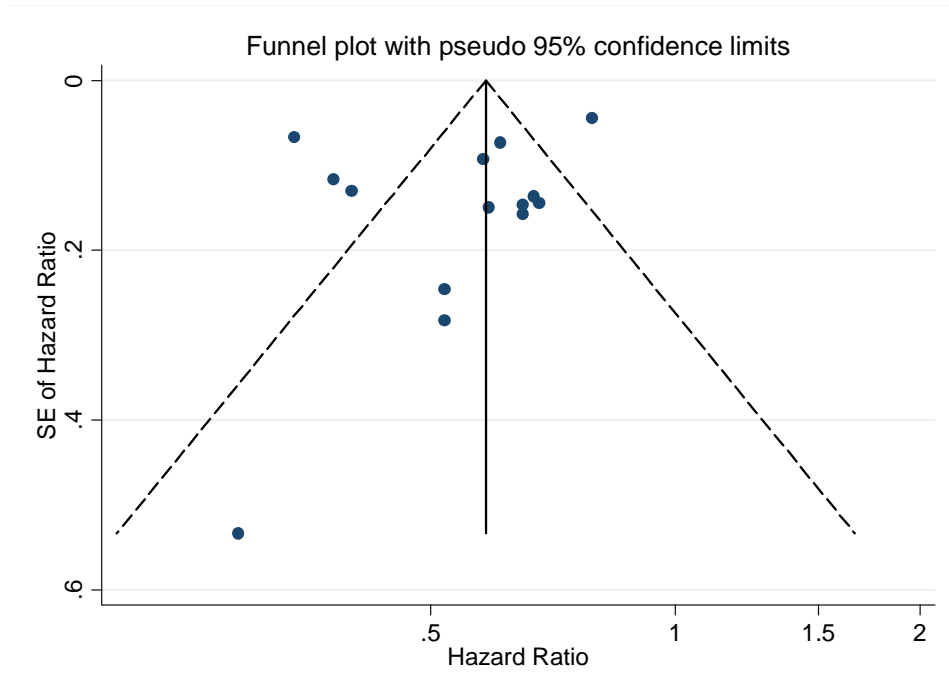

(D)

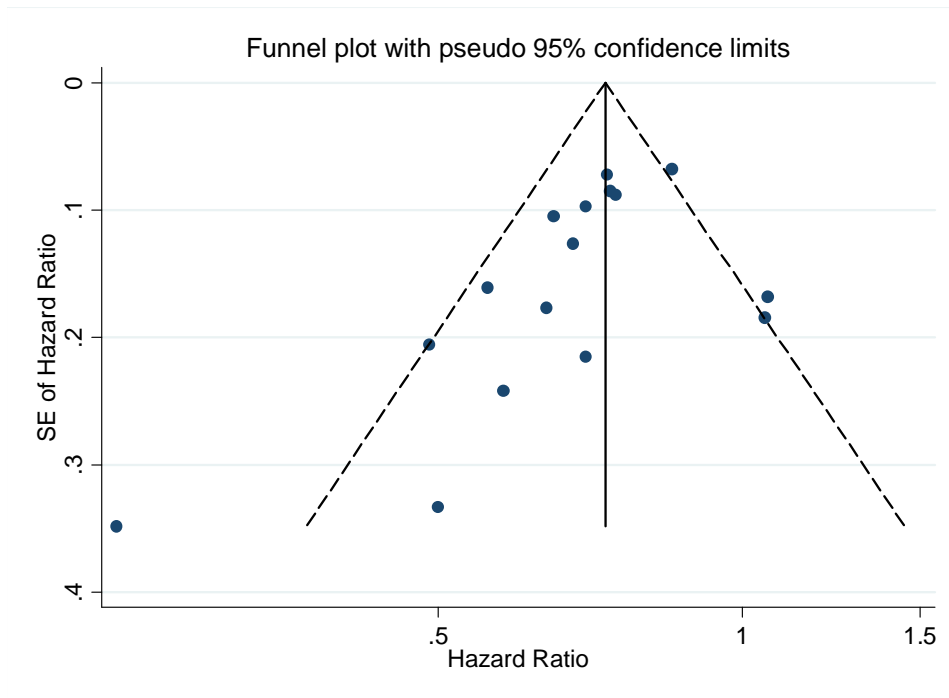

Supplement: supp_kwr301_kwr301_Web_Figures.pdf [file supp_kwr301_kwr301_Web_Figures.pdf]
