# Supplementary material
Source: PubMed Central journal article supplement (PMC3271813)
Supplement: supp_kwr301_kwr301_Web_Tables.pdf [file supp_kwr301_kwr301_Web_Tables.pdf]

**Web Table 1:** Randomized clinical trials of statins and risk of coronary heart disease (CHD) or mortality

| Author and year (study acronym) | Study population                                                                                                                                                                                                                                                           | Exclusion criteria                                                                                                                                                                                                                                                                                                                                   | Intervention groups                                                                         | Primary outcome                                                                                            | Follow-up        | Compliance                                        |
|---------------------------------|----------------------------------------------------------------------------------------------------------------------------------------------------------------------------------------------------------------------------------------------------------------------------|------------------------------------------------------------------------------------------------------------------------------------------------------------------------------------------------------------------------------------------------------------------------------------------------------------------------------------------------------|---------------------------------------------------------------------------------------------|------------------------------------------------------------------------------------------------------------|------------------|---------------------------------------------------|
| <b>Primary prevention</b>       |                                                                                                                                                                                                                                                                            |                                                                                                                                                                                                                                                                                                                                                      |                                                                                             |                                                                                                            |                  |                                                   |
| Furberg 1994 (ACAPS) (1)        | 919 asymptomatic men and women, 40 to 79 years old, with early carotid atherosclerosis as defined by B-mode ultrasonography and LDL cholesterol between the 60th and 90th percentiles, mean age 61.7 years and 51.5% male                                                  | History of MI, stroke, or angina                                                                                                                                                                                                                                                                                                                     | Lovastatin 20-40 mg/d or placebo                                                            | Angiographic measures                                                                                      | Mean 2.84 years  | 77% in both arms                                  |
| Downs 1998 (AFCAPS/TexCAPS) (2) | 5608 men and 997 women 45 to 73 years old with average TC and LDL-C and below-average HDL-C and had no prior history, signs, or symptoms of definite myocardial infarction, angina, claudication, CVA, or TIA                                                              | Uncontrolled HTN, secondary hyperlipidemia, or type 1 or type 2 DM that was either managed with insulin or associated with a glycohemoglobin >10%. a body weight of more than 50% greater than the desirable limit for height                                                                                                                        | Lovastatin (20-40 mg/d) or placebo in addition to a low-saturated fat, low-cholesterol diet | First acute major coronary event defined as fatal or nonfatal MI, unstable angina, or sudden cardiac death | Mean 5.2 years   | 71% in treatment arm and 63% in controls          |
| ALLHAT-LLT 2002 (3)             | Ambulatory persons (n=10355), aged 55 years or older, with LDL of 120 to 189 mg/dL (100 to 129 mg/dL if known CHD) and triglycerides lower than 350 mg/dL, mean age 66 years, 49% women, 38% black and 23% Hispanic, 14% had a history of CHD, and 35% had type 2 diabetes | Currently receiving lipid-lowering therapy, taking large doses of niacin, or taking Probuocol in the last year; known to be intolerant of statins or to have significant liver or kidney disease (serum ALT >100 IU/L or serum creatinine >2.0 mg/dL or other contraindications for statin therapy; or had a known secondary cause of hyperlipidemia | Pravastatin 40 mg/d or usual care                                                           | All-cause mortality                                                                                        | Mean 4.8 years   | 71% in the control arm, 77% in treatment arm      |
| Sever 2003 (ASCOT-LLA) (4)      | 19342 hypertensive patients (aged 40-79 years with at least three other CVD risk factors and fasting TC<6.5 mmol/L mainly white (95%) and male (81%), with a mean age of 63 years and                                                                                      | Previous MI, current treated angina, CeVD in the past 3 months, fasting TG>4.5 mmol/L, CHF, uncontrolled arrhythmia or any other clinically important hematological or biochemical abnormality on screening                                                                                                                                          | Atorvastatin 10 mg/d or placebo                                                             | Non-fatal MI and fatal CHD                                                                                 | Median 3.3 years | 87% in treatment and 91% in control after 3 years |

|                          |                                                                                                                                                                                                                        |                                                                                                                                                                                                                                                                                                                                                                                                                                                 |                                 |                       |                  |                                              |
|--------------------------|------------------------------------------------------------------------------------------------------------------------------------------------------------------------------------------------------------------------|-------------------------------------------------------------------------------------------------------------------------------------------------------------------------------------------------------------------------------------------------------------------------------------------------------------------------------------------------------------------------------------------------------------------------------------------------|---------------------------------|-----------------------|------------------|----------------------------------------------|
|                          | at least 3 of the following: LVH, abnormalities on ECG, DM, PAD, previous stroke or TIA, male, aged 55 or older, microalbuminuria or proteinuria, smoking, cholesterol/HDL $\geq$ 6 or family history of premature CHD |                                                                                                                                                                                                                                                                                                                                                                                                                                                 |                                 |                       |                  |                                              |
| Knopp 2006 (ASPEN) (5)   | 2411 patients with type 2 DM for 3 years or more and low LDL (<3.6 mmol/L if history of MI or interventional procedure and < 4.1 mmol/L if not), TG<600 mg/dL, aged 40-75                                              | Type 1 DM, MI, interventional procedure or episodes of unstable angina less than 3 months before screening, HbA1c>10%, active liver disease or hepatic dysfunction, severe renal disease, CHF treated with digoxin, CK>3 times upper limit, BP>160/100 mmHg, BMI >35 kg/m <sup>2</sup> , alcohol or drug abuse, hypersensitivity to study medication, current or planned pregnancy, placebo run-in compliance <80%, use of excluded medications | Atorvastatin 10 mg/d or placebo | CVD death or event    | Median 4 years   | 67.5% in treatment arm and 57.6% in controls |
| Hedblad 2001 (BCAPS) (6) | 793 men and women 49 to 70 years of age with plaque in the right carotid artery but with no symptoms of CAD, mean age 61.8, 41.5% male                                                                                 | History of MI, angina pectoris, or stroke within the preceding 3 months; history of surgical intervention in the right carotid artery; regular use of beta-blockers or statins; SBP>160 or DBP>95 mmHg; TC>8.0 mmol/L; hyperglycemia suspected to require insulin treatment; and conditions that in the opinion of the investigator rendered the subject unsuitable for the trial                                                               | Fluvastatin 40 mg/d or placebo  | Angiographic measures | Mean 3 years     | 79% in treatment and 77% in placebo arm      |
| Mercuri 1996 (CAIUS) (7) | 305 patients with atherosclerosis and carotid intima media thickness and without history of CHD; 53% male and mean age 55 years with high baseline LDL (mean 181 mg/dL)                                                | Persistent liver function abnormalities, other serious medical conditions and regular use of lipid-lowering agents, anticoagulants and calcium antagonists                                                                                                                                                                                                                                                                                      | Pravastatin 40 mg/d or placebo  | Angiographic measures | 3 years          |                                              |
| Colhoun 2004 (CARDS) (8) | 2838 diabetes patients aged 40–75 years with no documented                                                                                                                                                             | Any past history of MI, angina, coronary vascular surgery, CVA, or severe PVD                                                                                                                                                                                                                                                                                                                                                                   | Atorvastatin 10 mg/d or placebo | Acute CHD events      | Median 3·9 years | 85% in treatment and 91% in                  |

|                             |                                                                                                                                                                      |                                                                                                                                                                                                                                                                                                                                                                                                                                                                                                          |                                                               |                                  |                                   |                         |
|-----------------------------|----------------------------------------------------------------------------------------------------------------------------------------------------------------------|----------------------------------------------------------------------------------------------------------------------------------------------------------------------------------------------------------------------------------------------------------------------------------------------------------------------------------------------------------------------------------------------------------------------------------------------------------------------------------------------------------|---------------------------------------------------------------|----------------------------------|-----------------------------------|-------------------------|
|                             | previous history of CVD, LDL $\leq$ 4.14 mmol/L, fasting TG $\leq$ 6.78 mmol/L, and at least one of the following: retinopathy, albuminuria, current smoking, or HTN | (defined as warranting surgery)                                                                                                                                                                                                                                                                                                                                                                                                                                                                          |                                                               |                                  |                                   | controls during 4 years |
| Sawayama 2002 (FAST) (9)    | 246 patients with TC $\geq$ 220 mg/dL aged 30-89, mean age 66.1 yrs and 31.3% male                                                                                   | TG $\geq$ 350 mg/dL, uncontrolled heart failure, recent (<6 months) MI; severe or unstable angina pectoris; hypothyroidism/hyperthyroidism or other endocrine diseases; secondary hyperlipidemia; uncontrolled DM; uncontrolled HTN; heavy drinking; obese patients on weight reduction programs; diseases that might interfere with drug absorption; any severe illness; and treatment with certain drugs, including corticosteroids, other lipid-lowering agents or antacids containing aluminum salts | Pravastatin 10 mg/d or diet alone                             | Major cardiovascular events      | 2 years                           | -                       |
| Anderssen 2005 (HYRIM) (10) | 568 drug-treated hypertensive men aged 40–74 years with TC 4.5–8.0 mmol/L, TG < 4.5 mmol/L, BMI 25–35 kg/m <sup>2</sup> , and a sedentary lifestyle                  | Any symptomatic CVD (MI, angina pectoris, stroke), CHF, type 1 DM, history of coronary intervention, need for treatment with lipid-lowering medications other than the study drug, known or suspected impaired hepatic or renal function or malignancy, history of alcohol and/or drug abuse, vegetarian diet or diet comprising a high omega-3 fatty acid intake, and inability to perform physical exercise                                                                                            | Fluvastatin 40 mg/d or lifestyle in a 2 by 2 factorial design | Angiographic measures            | 4 years                           | -                       |
| Ridker 2008 (JUPITER) (11)  | 17802 patients including men over 50 and women over 60 without history of CVD and LDL < 130 mg/dL and CRP > 2 mg/L and triglycerides < 500 mg/dL                     | Patients with previous or current use of lipid-lowering therapy, or postmenopausal HRT, evidence of hepatic dysfunction, high CK level, high creatinine level, DM, uncontrolled HTN, cancer within 5 years before enrollment, uncontrolled hypothyroidism, and a recent history of alcohol or drug abuse or                                                                                                                                                                                              | Rosuvastatin, 20 mg/d or matching placebo                     | First major cardiovascular event | Maximum 5 years; median 1.9 years | 75% in both arms        |

|                              |                                                                                                                                                                                     |                                                                                                                                                                                                                                                                                                                                                                                                                                                       |                                               |                            |                  |                                                    |
|------------------------------|-------------------------------------------------------------------------------------------------------------------------------------------------------------------------------------|-------------------------------------------------------------------------------------------------------------------------------------------------------------------------------------------------------------------------------------------------------------------------------------------------------------------------------------------------------------------------------------------------------------------------------------------------------|-----------------------------------------------|----------------------------|------------------|----------------------------------------------------|
|                              |                                                                                                                                                                                     | another medical condition that might compromise safety or the successful completion of the study                                                                                                                                                                                                                                                                                                                                                      |                                               |                            |                  |                                                    |
| Salonen 1995 (KAPS) (12)     | 447 men with 4.25 < LDL < 8 mmol/L and BMI < 32 kg/m <sup>2</sup> who after a 2.5 months run-in phase with placebo and dietary - advice still had LDL > 4 mmol/L, mean age 57 years | Liver enzymes (ALT, AST) exceeding 1.5 fold the laboratory upper limit                                                                                                                                                                                                                                                                                                                                                                                | Pravastatin 40 mg/d or placebo                | Angiographic measures      | Max 3 years      | 92% in treatment and 93% in placebo                |
| Nakamura 2006 (MEGA) (13)    | 7,832 hypercholesterolemic patients (total cholesterol 5.69 to 6.98 mmol/L) and no history of CHD, men and post-menopausal women aged 40-70                                         | Familial hypercholesterolemia, history of angina, MI or bypass surgery or PCI, ECG abnormalities consistent with MI, history of PAD, stroke or TIA, congenital or rheumatic heart disease, chronic atrial fibrillation, current diagnosis of malignancy, severe liver or kidney disease, poorly controlled HTN or DM, secondary hyperlipidemia, current use of corticosteroids and other conditions at the discretion of the individual physician     | Pravastatin 10-20 mg/d and diet vs diet alone | First occurrence of CHD    | Mean 5.3 years   | 89% in treatment arm                               |
| Shepherd 1995 (WOSCOPS) (14) | 6595 men, 45 to 64 years of age, with a mean plasma TC of 272 mg/dL                                                                                                                 | History of MI and non-fasting TC < 252 mg/dL, LDL < 155 mg/dL during second and third visits, major ECG abnormalities or arrhythmias or serious illness                                                                                                                                                                                                                                                                                               | Pravastatin 40 mg/d or placebo                | non-fatal MI and fatal CHD | Mean 4.9 years   | 70.4% in treatment and 69.2% in controls at year 5 |
| <b>Secondary prevention</b>  |                                                                                                                                                                                     |                                                                                                                                                                                                                                                                                                                                                                                                                                                       |                                               |                            |                  |                                                    |
| Anonymous 1994 (4S) (15)     | 4444 patients 35 to 70 years old with angina pectoris or previous MI and TC of 5.5 to 8 mmol/L on a cholesterol lowering diet                                                       | Pre-menopausal women of childbearing potential, secondary hypercholesterolemia, unstable or Prinzmetal angina, tendon xantomata, planning coronary artery surgery or angioplasty, MI during the past 6 months, antiarrhythmic therapy, CHF requiring treatment with digitalis, diuretics or vasodilators, persistent atrial fibrillation, cardiomegaly, hemodynamically important valvular heart disease, history of completed stroke, impaired liver | Simvastatin (with dosage adjusted) or placebo | Coronary deaths            | Median 5.4 years | 90% in treatment and 87% in controls               |

|                            |                                                                                                                                                                                                                                                                                |                                                                                                                                                                                                                                                                                                                                                                                                                                                      |                                                   |                          |                  |                                              |
|----------------------------|--------------------------------------------------------------------------------------------------------------------------------------------------------------------------------------------------------------------------------------------------------------------------------|------------------------------------------------------------------------------------------------------------------------------------------------------------------------------------------------------------------------------------------------------------------------------------------------------------------------------------------------------------------------------------------------------------------------------------------------------|---------------------------------------------------|--------------------------|------------------|----------------------------------------------|
|                            |                                                                                                                                                                                                                                                                                | function, partial ileal bypass, history of drug or alcohol abuse, poor mental function, other serious disease, current treatment with another investigational drug or hypersensitivity to statins.                                                                                                                                                                                                                                                   |                                                   |                          |                  |                                              |
| Koren 2004 (ALLIANCE) (16) | 2442 patients with CHD from managed care and Veteran Administration organization, >18 years old and LDL levels between 110 and 200 mg/dL if on lipid-lowering treatment and 130 and 250 mg/dL if not on treatment.                                                             | -                                                                                                                                                                                                                                                                                                                                                                                                                                                    | Atorvastatin titrated up to 80 mg/d or usual care | All-cause death          | Median 4.5 years | -                                            |
| Knopp 2006 (ASPEN) (5)     | 2411 patients with type 2 DM for 3 years or more and low LDL (<3.6 mmol/L if history of MI or interventional procedure and < 4.1 mmol/L if not), TG < 600 mg/dL, aged 40-75 years                                                                                              | Type 1 DM, MI, interventional procedure or episodes of unstable angina less than 3 months before screening, HbA1c>10%, active liver disease or hepatic dysfunction, severe renal disease, CHF treated with digoxin, CK > 3 times upper limit, BP > 160/100 mmHg, BMI > 35 kg/m <sup>2</sup> , alcohol or drug abuse, hypersensitivity to study medication, current or planned pregnancy, placebo run-in compliance <80%, use of excluded medications | Atorvastatin 10 mg/d or placebo                   | CVD death or event       | Median 4 years   | 67.5% in treatment arm and 57.6% in controls |
| Yokoi 2005 (ATHEROMA) (17) | 361 patients with age 40–69 years; TC of 195–265 mg/dL; and 1 stenosis of >25% in major coronary segments                                                                                                                                                                      | ACS or previous CABG                                                                                                                                                                                                                                                                                                                                                                                                                                 | Pravastatin 10-20 mg/d or diet alone              | Angiographic measures    | 3 years          | -                                            |
| Flaker 1999 (CARE) (18)    | 4159 patients 21 to 75 years old who survived an MI (3 to 20 months before randomization), had a TC < 240 mg/dl (6.2 mmol/L), and LDL of 115 to 174 mg/dL (3.0 to 4.5 mmol/L) and fasting glucose levels of no more than 220 mg/dL, fasting TG of less than 350 mg/dL, LVEF no | -                                                                                                                                                                                                                                                                                                                                                                                                                                                    | Pravastatin 40 mg/d or placebo                    | CHD death or nonfatal MI | Median 5 years   | -                                            |

|                          |                                                                                                                                                                                                                                                                                  |                                                                                                                                                                                                                                                                                                                                                                                                                                                                                                                                                                                                                                                                                                                                                                                                                                                          |                                                                   |                                     |         |                                           |
|--------------------------|----------------------------------------------------------------------------------------------------------------------------------------------------------------------------------------------------------------------------------------------------------------------------------|----------------------------------------------------------------------------------------------------------------------------------------------------------------------------------------------------------------------------------------------------------------------------------------------------------------------------------------------------------------------------------------------------------------------------------------------------------------------------------------------------------------------------------------------------------------------------------------------------------------------------------------------------------------------------------------------------------------------------------------------------------------------------------------------------------------------------------------------------------|-------------------------------------------------------------------|-------------------------------------|---------|-------------------------------------------|
|                          | less than 25% and no symptomatic CHF                                                                                                                                                                                                                                             |                                                                                                                                                                                                                                                                                                                                                                                                                                                                                                                                                                                                                                                                                                                                                                                                                                                          |                                                                   |                                     |         |                                           |
| Waters 1994 (CCAIT) (19) | 331 patients with diffuse but not necessarily severe coronary atherosclerosis documented on a recent arteriogram and with fasting TC between 220 and 300 mg/dL, mean age 53, 81% male                                                                                            | Previous CABG; coronary angioplasty in the 6 months preceding the qualifying coronary arteriogram; LVEF < 40%; left main coronary artery stenosis > 50%; three-vessel disease with preseptal left anterior descending stenosis > 70%; any coexisting severe illness that would make repeat arteriography ethically unjustifiable; MI or unstable angina within 6 weeks before study entry or after the entry coronary arteriogram; a technically suboptimal coronary arteriogram; plasma TG>500 mg/dL; concurrent use of lipid-lowering drugs, cyclosporine, anticoagulants, corticosteroids, or Cimetidine; elevated hepatic enzymes or impaired renal function; and patients living too far away from the clinic or having any potential condition or problem that might hinder follow-up or compliance or present an unacceptable risk to the patient | Lovastatin 20 mg/d titrated to 40 mg/d if LDL>130 mg/dL at week 4 | Angiographic end points             | 2 years | -                                         |
| Colivicchi 2002 (20)     | 81 patients with unstable angina or non-Q-wave MI, angiographic evidence of severe CAD and evidence of symptomatic myocardial ischemia, LVEF > 35%, mean age 68 years in the control and 69 years in the treatment group, 59% male in the control and 58% in the treatment group | CHF, the need for continuous use of intravenous antianginal medications, and the presence of any major concurrent illness                                                                                                                                                                                                                                                                                                                                                                                                                                                                                                                                                                                                                                                                                                                                | Atorvastatin 80 mg/d or usual care                                | Recurrent ischemia or cardiac death | 1 year  | 97.5% in the treatment arm                |
| Ostadal 2010 (FACS) (21) | 156 patients with ACS, 71% male in treatment and 65% male in placebo group; mean age 61 years in the treatment and 63 years in the placebo group                                                                                                                                 | Concomitant active liver disease or persistent elevation of transaminases more than three times above the upper limit of normal, history of lipid lowering therapy < 30 days before index event,                                                                                                                                                                                                                                                                                                                                                                                                                                                                                                                                                                                                                                                         | Fluvastatin 80 mg/d or placebo                                    | Major adverse cardiovascular event  | 1 year  | 75% in treatment and 22% in placebo group |

|                                  |                                                                                                                                                            |                                                                                                                                                                                                                                                                                                                                                                                                                                                                                                                                               |                                          |                               |                  |                                                                  |
|----------------------------------|------------------------------------------------------------------------------------------------------------------------------------------------------------|-----------------------------------------------------------------------------------------------------------------------------------------------------------------------------------------------------------------------------------------------------------------------------------------------------------------------------------------------------------------------------------------------------------------------------------------------------------------------------------------------------------------------------------------------|------------------------------------------|-------------------------------|------------------|------------------------------------------------------------------|
|                                  |                                                                                                                                                            | known allergy for Fluvastatin or any present additives in the drug, disability of oral drug administration, disability of follow-up, pregnancy or nursing, women of fertile age without effective contraception, suspicions of muscle disease like myositis, < 18 years old, CK $\geq 5$ times of the upper limit of normal range with other casual explanation than presence of MI                                                                                                                                                           |                                          |                               |                  |                                                                  |
| GISSI investigators 2000 (22)    | 4271 recent AMI patients with total cholesterol $\geq 200$ mg/dL                                                                                           | -                                                                                                                                                                                                                                                                                                                                                                                                                                                                                                                                             | Pravastatin 20 mg/d or no treatment      | CVD event or death            | Mean 1.9 years   | 86.2% in treatment arm and 81% in controls                       |
| Heart Protection Study 2002 (23) | 20536 adults aged 40-80 years at high risk of CAD due to either previous history of CAD, other occlusive arterial disease or DM or treated HTN at baseline | Chronic liver disease or abnormal liver function (ALT>67 IU/L), severe renal disease or renal impairment, inflammatory muscle disease or evidence of muscle problems, concurrent treatment with cyclosporine, fibrates, or high-dose niacin; child-bearing potential; severe heart failure; some life-threatening condition other than vascular disease or diabetes (eg, severe chronic airways disease or any cancer; or conditions that might limit long-term compliance (eg, severely disabling stroke, dementia, or psychiatric disorder) | Simvastatin 40 mg/d or matching placebo  | Major vascular event          | Mean 5 years     | 82% in treatment arm and 68% in controls at the end of follow-up |
| Anonymous 2002 (LIPID) (24)      | 9014 patients with previous MI or unstable angina and a baseline TC of 4.0–7.0 mmol/L, median age 62 years                                                 | -                                                                                                                                                                                                                                                                                                                                                                                                                                                                                                                                             | Pravastatin 40 mg/d or placebo           | Death from CHD                | Mean 6 years     | 81% in treatment arm and 76% in controls                         |
| Serruys 2002 (LIPS) (25)         | 1677 patients undergoing a first successful PCI and had baseline total cholesterol between 135 and 270 mg/dL with fasting TG < 400 mg/dL                   | Sustained SBP > 180 mm Hg and DBP > 100 mm Hg despite medical therapy, LVEF < 30%, history of previous revascularization (PCI or CABG), severe valvular disease, idiopathic cardiomyopathy or congenital heart disease, severe renal dysfunction, obesity                                                                                                                                                                                                                                                                                     | Fluvastatin 40 mg twice daily or placebo | Cardiac death or non-fatal MI | Median 3.9 years | 81% in the treatment and 76% in the control arm                  |

|                              |                                                                                                                                                                                                                                          |                                                                                                                                                                                                                                                                                                                                                                                                                                                                                                                                                                                                                                                                                                                                                                                                                                                                         |                                                     |                             |                |                                            |
|------------------------------|------------------------------------------------------------------------------------------------------------------------------------------------------------------------------------------------------------------------------------------|-------------------------------------------------------------------------------------------------------------------------------------------------------------------------------------------------------------------------------------------------------------------------------------------------------------------------------------------------------------------------------------------------------------------------------------------------------------------------------------------------------------------------------------------------------------------------------------------------------------------------------------------------------------------------------------------------------------------------------------------------------------------------------------------------------------------------------------------------------------------------|-----------------------------------------------------|-----------------------------|----------------|--------------------------------------------|
|                              |                                                                                                                                                                                                                                          | (BMI > 35 kg/m <sup>2</sup> ), and the presence of malignant or other disease with a life expectancy of < 4 years                                                                                                                                                                                                                                                                                                                                                                                                                                                                                                                                                                                                                                                                                                                                                       |                                                     |                             |                |                                            |
| Riegger 1999 (LiSA) (26)     | 365 patients aged 40-70 years with stable symptomatic CHD, TC > 250 mg/dL and LDL > 160 mg/dL and TG < 300 mg/dL after 4 weeks on a lipid-lowering diet. Mean age was 59.4 years in treatment and 60.2 in placebo group. 61.6% were male | PTCA or CABG, CHF (NYHA III and IV), hypersensitivity or intolerance to statins, therapy with nonregistered drugs or participation in other experimental studies within 3 months before the start of the trial; diseases and conditions which could influence the pharmacokinetics or pharmacodynamics of the trial medication, e.g. gastro-intestinal diseases; liver and kidney diseases; AST and ALT >120% of the upper limit of normal; g-glutamyl transferase (g-GT), alkaline phosphatase, bilirubin and creatinine above 150% of the upper limit of normal; pregnant or nursing women, women of child-bearing age not using adequate contraception; non-permitted concomitant medication; medication abuse, drug abuse, and/or alcohol abuse. likely to be non-compliant or not willing/able to appear for the check-up visits, refusing to give written consent | Fluvastatin 40 mg or placebo                        | Incidence of cardiac events | 1 year         | 79.3% in both arms                         |
| Anonymous 1994 (MAAS) (27)   | 381 patients with CAD undergoing routine angiography and at least 2 atheromatous segments, TC between 5.5 and 8 mmol/L, 88% male in placebo and 89% in treatment group; mean age 54.9 in placebo and 55.6 in treatment arm.              | Previous CABG, MI or unstable angina within 6 wks of angiogram, PTCA or major surgery within 3 months before angiogram, angiogram more than 60 days before randomization, CHF or EF < 30%, DBP > 100 mmHg despite treatment, FPG > 7.8mmol/L or DM requiring treatment other than diet, secondary hypercholesterolemia, use of lipid-lowering, steroid or estrogen within 6 weeks before randomization                                                                                                                                                                                                                                                                                                                                                                                                                                                                  | Simvastatin 20 mg/d                                 | Angiographic measures       | Max 4 years    | -                                          |
| Blankenhorn 1993 (MARS) (28) | 270 patients, 37 to 67 years old, with TC from 4.92 to 7.64 mmol/L (190 to 295 mg/dL) and                                                                                                                                                | HTN (DBP > 115 mm Hg or, if the patient was receiving treatment, > 100 mm Hg), DM, and the use of lipid-lowering drugs within 2                                                                                                                                                                                                                                                                                                                                                                                                                                                                                                                                                                                                                                                                                                                                         | Lovastatin 80 mg/d with back-titration if needed or | Angiographic measures       | Mean 2.2 years | 96% in the Lovastatin group and 95% in the |



|                                 |                                                                                                                                                                                                              |                                                                                                                                                                                                                                                                                                                                                                                                                           |                                           |                                                             |                |                                          |
|---------------------------------|--------------------------------------------------------------------------------------------------------------------------------------------------------------------------------------------------------------|---------------------------------------------------------------------------------------------------------------------------------------------------------------------------------------------------------------------------------------------------------------------------------------------------------------------------------------------------------------------------------------------------------------------------|-------------------------------------------|-------------------------------------------------------------|----------------|------------------------------------------|
|                                 | angiographically defined CAD, mean age 58 and 91% male                                                                                                                                                       | months of randomization, premenopausal women (unless they had undergone surgical sterilization), candidates for CABG                                                                                                                                                                                                                                                                                                      | placebo                                   |                                                             |                | placebo group                            |
| Nakagawa 2004 (PCS) (29)        | 329 patients with CAD and TC between 180 and 219 mg/dL, mean age 59 and 91% male in the treatment and 92% in the control arm                                                                                 | Stenosis $\geq$ 90% or $<$ 25%, age $\geq$ 70 or $<$ 20 years, MI or stroke within 1 month of angiography, severe hepatic dysfunction or renal disease, secondary hypercholesterolemia, pregnancy or breast feeding, allergy to pravastatin, long-term hospitalization, malignant disease                                                                                                                                 | Pravastatin 10 mg/d or no dietary control | Angiographic measures                                       | 5 years        | 90% in both arms                         |
| Sato 2008 (OACIS-LIPID) (30)    | 353 patients with AMI who had TC of 200-250 mg/dL and TG $<$ 300 mg/dL. mean age 63 years and 73% male in the treatment and 80% in the control arm                                                           | Receiving concurrent therapy with any statins or had a history of side-effects associated with any statin, evidence of life-threatening arrhythmia, severe chronic CHF, hepatic dysfunction, renal failure, CeVD, poorly controlled DM, pregnancy, lactation, age $<$ 20 yrs, and unable to take medication or absence of written informed consent, patients whom the doctors consider inappropriate for any other reason | Pravastatin 10 mg/d or no treatment       | Cardiovascular events or revascularization                  | 9 months       | -                                        |
| Petronio 2005 (31)              | 71 patients undergoing elective coronary stenting with normal cholesterol levels, mean age 63 years in the treatment and 60 years in the control arms, 72% male in the treatment and 77% in the control arms | Patients with ACS, DM, LVEF $<$ 30%, ongoing statin or other lipid-lowering treatment, intolerance to statins, more lesions requiring revascularization, vessels $<$ 2.75 mm, lesions $>$ 20 mm, and chronic total occlusions dating $>$ 1 month                                                                                                                                                                          | Simvastatin 20 mg/d or no treatment       | Angiographic measures                                       | 1 year         | -                                        |
| Furberg 1995 (PLAC I & II) (32) | 559 CAD patients with moderately elevated levels of LDL cholesterol (130-189 mg/dL following diet stabilization)                                                                                             | -                                                                                                                                                                                                                                                                                                                                                                                                                         | Pravastatin or placebo                    | Death or coronary events                                    | 3 years        | -                                        |
| Shepherd 2002 (PROSPER) (33)    | 5804 men (n=2804) and women (n=3000) aged 70–82 years with a history of, or risk factors for, vascular disease with TC 4.0–9.0 mmol/L and TG $<$ 6.0 mmol/L, 44% had history of vascular                     | Individuals with poor cognitive function (mini mental state examination score $<$ 24)                                                                                                                                                                                                                                                                                                                                     | Pravastatin 40 mg/d or placebo            | Coronary death, non-fatal MI, and fatal or non-fatal stroke | Mean 3.2 years | 94% in treatment arm and 90% in controls |

|                             |                                                                                                                                                                                                                                              |                                                                                                                                                                                                                                                                                                                                                                                                                                                                                                                                                                                                                                                                                                                                                                                                                                        |                                                                              |                                         |                  |                   |
|-----------------------------|----------------------------------------------------------------------------------------------------------------------------------------------------------------------------------------------------------------------------------------------|----------------------------------------------------------------------------------------------------------------------------------------------------------------------------------------------------------------------------------------------------------------------------------------------------------------------------------------------------------------------------------------------------------------------------------------------------------------------------------------------------------------------------------------------------------------------------------------------------------------------------------------------------------------------------------------------------------------------------------------------------------------------------------------------------------------------------------------|------------------------------------------------------------------------------|-----------------------------------------|------------------|-------------------|
|                             | disease                                                                                                                                                                                                                                      |                                                                                                                                                                                                                                                                                                                                                                                                                                                                                                                                                                                                                                                                                                                                                                                                                                        |                                                                              |                                         |                  |                   |
| Jukema 1995 (REGRESS) (34)  | 885 male patients with TC between 4-8 mmol/L who were scheduled for coronary angiography, mean age 56.5 years in the treatment and 55.9 years in the control arm, 50% in the treatment arm had prior history of MI                           | Age $\geq$ 70 years; inability or unwillingness to consent to and undergo a repeat coronary cinearteriography; noncompliance. Enrollment in another study protocol that includes a coronary cineangiogram and experimental drug therapy; TG > 4.0 mmol/L; life-threatening illnesses other than CAD or a concurrent serious illness; use of lipid-lowering drugs $\leq$ 6 weeks before qualifying lipid measurement ( $\leq$ 12 weeks for fibrates or statin), history of poor response to other statins, immune disorder (systemic lupus, dysproteinemia, or major hypersensitivity or allergic disorders) or use of immunosuppressive therapy or corticosteroids; significant metabolic disease; significant gastrointestinal disease or surgery that might interfere with drug absorption; Excess ethanol consumption (>3 drinks/d) | Pravastatin 40 mg/d or placebo                                               | Angiographic measures                   | 2 years          | -                 |
| Teo 2000 (SCAT) (35)        | 460 patients with age > 21 years, TC between 4.1 and 6.2 mmol/L, HDL < 2.2 mmol/L, and TG < 4 mmol/L and lower than TC, and angiographically detectable coronary atherosclerosis in 3 or more major coronary artery segments; and LVEF > 35% | Clear indications for or contraindications to study drugs, clinical instability, imminent need for intervention, other significant cardiac or systemic diseases, potential noncompliance, and inability to give informed consent                                                                                                                                                                                                                                                                                                                                                                                                                                                                                                                                                                                                       | Simvastatin 10 mg/d titrated to 40 mg/d during the first 3 months or placebo | Angiographic end points                 | Mean 47.8 months | ~95% on both arms |
| Amarenco 2006 (SPARCL) (36) | 4731 patients who had stroke or TIA 1-6 months before entry, had LDL of 100-190 mg/dL and no known CHD                                                                                                                                       | Atrial fibrillation, other cardiac sources of embolism and subarachnoid hemorrhage                                                                                                                                                                                                                                                                                                                                                                                                                                                                                                                                                                                                                                                                                                                                                     | Atorvastatin 80 mg/d or placebo                                              | Major coronary and cardiovascular event | Median 4.9 years | 75% in controls   |

**Web Table 2:** Observational studies on the effect of statins on coronary heart disease (CHD) or mortality

| Author and year            | Study population                                                                                                                                                                                | Eligibility criteria                                                                                                                                    | Comparison                                                                   | Outcome             | Follow-up        | Adjustment                                                                                                                                                                                                   | Method of adjustment                                                                                                                                           |
|----------------------------|-------------------------------------------------------------------------------------------------------------------------------------------------------------------------------------------------|---------------------------------------------------------------------------------------------------------------------------------------------------------|------------------------------------------------------------------------------|---------------------|------------------|--------------------------------------------------------------------------------------------------------------------------------------------------------------------------------------------------------------|----------------------------------------------------------------------------------------------------------------------------------------------------------------|
| <b>Primary prevention</b>  |                                                                                                                                                                                                 |                                                                                                                                                         |                                                                              |                     |                  |                                                                                                                                                                                                              |                                                                                                                                                                |
| Seeger 2003, 2005 (37, 38) | Members of Fallon Community Health Plan who had a recorded LDL > 130 mg/dL) at any time between 1994 and 1998                                                                                   | Enrolled for at least 1 year, have LDL, TG, HDL levels all in the 6 months preceding cohort entry, no diagnosis of PAD, and not current statin user     | Initiators vs. non-initiators of any statin (mostly Fluvastatin)             | First MI            | Maximum 6 years  | 52 variables including age, sex, smoking, LDL, HDL, TG, DM, HTN, health care utilization; one propensity model for each 1-year block                                                                         | Propensity score matching                                                                                                                                      |
| Smeeth 2009 (39)           | 5.5 million subjects in 303 general practices in the UK followed from Jan 1995 to Dec 2006 (The Health Improvement Network)                                                                     | More than 12 months prior continuous registration, some contact within the 6 months prior to event, diagnosis of atherosclerosis before index date      | Initiators vs. non-initiators of any statin matched by age, sex and practice | First MI            | Median 4.4 years | Age, sex, practice (by matching), observation time in the THIN database, BMI, SES, consultation rate, prescribing rate, smoking status, drinking habits, DM, CHD, CeVD, PAD, other diseases and use of drugs | Cox proportional hazard model with adjustment for age, sex, propensity score and further adjustment for diagnosis of diseases or use of drugs after index date |
| Leeper 2007 (40)           | 6107 consecutive patients seen at the Palo Alto VA Medical Center in Palo Alto, California, or 1 of 7 affiliated community clinics between 1998 and 2004 with LDL < 60 mg/dL, mean age 65 years | Patients who had no prescription within 150 days of the low LDL value or who had history of CHD                                                         | Having or not having a statin prescription                                   | All-cause mortality | Mean 2 years     | Age, sex, creatinine greater than 1.5 mg/dL, LDL level, prior malignancy, IHD, prior MI, PAD, HTN, CHF, DM, stroke, COPD, alcohol dependence, ACE inhibitors/ARBs, beta-blockers                             | Cox proportional hazard model and propensity scores adjustment                                                                                                 |
| Lemaitre 2002 (41)         | 1250 women and 664 men from the Cardiovascular Health Study, 65 years old or older                                                                                                              | Patients who had an MI or stroke, received drugs to lower TC at baseline and those for whom no treatment was recommended based on 1993 NCEP guidelines. | Use or non-use of statins                                                    | All-cause mortality | Median 7.3 years | Sex, age, DM, and prevalent CVD (angina, CABG, angioplasty, carotid endarterectomy, or bypass procedure on a leg artery)                                                                                     | Cox proportional hazard model                                                                                                                                  |

|                             |                                                                                                                                                                           |                                                                                                                         |                                                         |                                       |                  |                                                                                                                                                                                                                                 |                                                                            |
|-----------------------------|---------------------------------------------------------------------------------------------------------------------------------------------------------------------------|-------------------------------------------------------------------------------------------------------------------------|---------------------------------------------------------|---------------------------------------|------------------|---------------------------------------------------------------------------------------------------------------------------------------------------------------------------------------------------------------------------------|----------------------------------------------------------------------------|
|                             |                                                                                                                                                                           | participants with missing TC values                                                                                     |                                                         |                                       |                  |                                                                                                                                                                                                                                 |                                                                            |
| Gardette 2009 (42)          | 7722 French men from the Prospective Epidemiological Study of Myocardial Infarction (PRIME), aged 50 to 59 years at baseline                                              | Treatment with statin plus fibrate, lipid lowering drugs other than statin or fibrate, no plasma lipid level assessment | Use or non-use of statins                               | All-cause mortality                   | Mean 9.6 years   | Center, age, educational level, histories of CVD and severe chronic diseases, HTN, and DM; smoking habits, alcohol consumption, physical activity, waist circumference, and HDL and non-HDL cholesterol                         | Cox proportional hazard model                                              |
| <b>Secondary prevention</b> |                                                                                                                                                                           |                                                                                                                         |                                                         |                                       |                  |                                                                                                                                                                                                                                 |                                                                            |
| <b>Author and year</b>      | <b>Study population</b>                                                                                                                                                   | <b>Eligibility criteria</b>                                                                                             | <b>Comparison</b>                                       | <b>Outcome</b>                        | <b>Follow-up</b> | <b>Adjustment</b>                                                                                                                                                                                                               | <b>Method of adjustment</b>                                                |
| Allen-Maycock 2002 (43)     | 7220 patients with angiographically defined significant CAD, mean age 65 years and 74% male                                                                               | -                                                                                                                       | Having or not having a statin prescription on discharge | All-cause mortality                   | Mean 3.3 years   | Age, gender, CHF, renal failure, DM, CABG, coronary anatomy, PCI, hypertension, previous stroke, smoking                                                                                                                        | Cox proportional hazard                                                    |
| Carrier 2009 (44)           | 6655 patients who underwent CABG in the Montreal Heart Institute between 1995 and 2007                                                                                    | Concomitant valve or other cardiac surgical procedures or re-operation                                                  | Use vs. non-use of any statins                          | Combined death or re-operation or PCI | Maximum 12 years | Age, sex, diabetes, hyperlipidemia, antiplatelet, beta-blockers, ACE-inhibitor                                                                                                                                                  | Cox proportional hazard                                                    |
| Christensen 2010 (45)       | 12,483 critically ill patients > 45 yrs of age with a first-time admission to one of three highly specialized ICUs within the Aarhus University Hospital network, Denmark | -                                                                                                                       | Use vs. non-use of any statins                          | All-cause mortality                   | Maximum 1 year   | Age group, gender, medical/surgical department, diagnosis, Charlson index score and alcoholism-related disease, surgery within seven days, current use of ACE-inhibitors, beta blockers and low-dose aspirin and marital status | Cox proportional hazard                                                    |
| Cook 2009 (46)              | 4232 patients selected retrospectively from the Nova Scotia Seniors Pharmacare Program; 65 year old or older,                                                             | -                                                                                                                       | User-initiator vs. non-user                             | All-cause mortality                   | Mean 28 months   | Age, gender, region, TC, LDL, HDL, TG, DM, HTN, smoking, family history of CVD, previous PTCA/CABG/CHF/MI/cathet                                                                                                                | Propensity score categories and multivariate Cox proportional hazard model |

|                     |                                                                                                                                                                                                                                                              |                                                                                                |                                         |                                                  |               |                                                                                                                                                                                                                                                                                                                                              |                                                                                        |
|---------------------|--------------------------------------------------------------------------------------------------------------------------------------------------------------------------------------------------------------------------------------------------------------|------------------------------------------------------------------------------------------------|-----------------------------------------|--------------------------------------------------|---------------|----------------------------------------------------------------------------------------------------------------------------------------------------------------------------------------------------------------------------------------------------------------------------------------------------------------------------------------------|----------------------------------------------------------------------------------------|
|                     | discharged after a diagnosis of IHD, mean age 77.5 years, 48% male                                                                                                                                                                                           |                                                                                                |                                         |                                                  |               | erization/stroke/TIA, number of prescriptions in the past 6 months, year of entry into study, discharge diagnosis (unstable angina/MI), in-hospital procedures, on-discharge medications                                                                                                                                                     |                                                                                        |
| De Liefde 2008 (47) | 2109 patients with symptoms of PVD, mean age 63 and 67% male, 20% had previous MI, 20% revascularization and 30% abnormal ECG                                                                                                                                | -                                                                                              | Baseline use vs. non-use of statins     | Major cardiovascular events, all-cause mortality | Mean 5 years  | Age, gender, current smoking at baseline, HTN, COPD, hypercholesterolemia, DM, history of CHF, previous CVD, renal failure, SBP at rest, and ankle-brachial index at rest                                                                                                                                                                    | Cox proportional hazard model (Results were the same using propensity score analysis.) |
| De Luca 2006 (48)   | 1513 patients with ST elevation MI and primary angioplasty, mean age 61 years and 78% male                                                                                                                                                                   | Presenting within 6 hours of symptoms                                                          | Statin users and non-users at discharge | All-cause mortality                              | At 1 year     | Age, sex, DM, previous MI, PCI or CABG, hypercholesterolemia, smoking, HTN, anterior MI, Killip 1 class, multivessel disease, angiographic collateral, successful reperfusion, pre-procedural TIMI flow, use of intra-aortic balloon pump and therapy at discharge, including beta-blockers, ACE-inhibitors, nitrates and calcium antagonist | Propensity score                                                                       |
| Fintel 2007 (49)    | 13715 patients from the PharMetrics database of commercially insured subjects in the US with a cardiac-related hospitalization in prior 12 months, less than 65 years old, not covered by Medicare risk, and with a previous diagnosis or treatment of lipid | Data on all health care utilizations, continuously eligible for drug benefits during follow-up | Use or non-use of statins               | All-cause mortality                              | Up to 3 years | Sex, payer type, geographic region, pre-index presence of CHD comorbidities, presence of comorbidities during index hospitalization, preindex use of treatment for lipid disorders, concomitant medications for selected conditions, pre-index CHD event diagnosis, CHD event at index diagnosis, total pre-                                 | Cox proportional hazard model after propensity score matching                          |

|                    |                                                                                                                                                         |                                                                                                                                                                                                                                                                                                                                                                           |                                                            |                     |                         |                                                                                                                                                                                                                                                                                                                                                                |                                                                             |
|--------------------|---------------------------------------------------------------------------------------------------------------------------------------------------------|---------------------------------------------------------------------------------------------------------------------------------------------------------------------------------------------------------------------------------------------------------------------------------------------------------------------------------------------------------------------------|------------------------------------------------------------|---------------------|-------------------------|----------------------------------------------------------------------------------------------------------------------------------------------------------------------------------------------------------------------------------------------------------------------------------------------------------------------------------------------------------------|-----------------------------------------------------------------------------|
|                    | disorders, mean age 58.9 and 68.7% male                                                                                                                 |                                                                                                                                                                                                                                                                                                                                                                           |                                                            |                     |                         | index health care costs, total index hospitalization costs, index hospitalization length of stay, and days of follow up                                                                                                                                                                                                                                        |                                                                             |
| Feringa 2009 (50)  | 1,693 patients aged 65 years or older who underwent non-cardiac vascular surgery, mean age 73 and 76% men, 36% had CAD and 49% abnormal ECG at baseline | -                                                                                                                                                                                                                                                                                                                                                                         | Peri-operative use vs. non-use of statins                  | All-cause mortality | Median 8.2 years        | Age, sex, HTN, hypercholesterolemia, smoking, COPD and propensity score                                                                                                                                                                                                                                                                                        | Cox proportional hazard model using propensity scores                       |
| Foody 2006 (51)    | 23,013 Medicare patients (> 65 years old) with a discharge diagnosis of AMI                                                                             | Excluded patients who transferred to another hospital; left against medical advice; had a terminal illness, comorbid condition limiting statin use, a do-not-resuscitate order, or intolerance to statins; or resided outside the United States, also excluded patients who were on statins before admission, died during hospitalization or had an unknown date of death | Having vs. not having a discharge prescription for statins | All-cause mortality | 3 years after discharge | Age, sex, race, history of HTN, DM, CHF, MI, PCI, CABG, dementia, smoking, heart rate, SBP, rales, location and type of MI, LV function, peak CK level, atrial fibrillation, stroke, shock, arrest, WBC, creatinine, glucose, physician specialty, type of hospital, medication use at discharge                                                               | Logistic regression using propensity scores                                 |
| Furukawa 2008 (52) | 9225 patients undergoing their first coronary revascularization in CREDO-Kyoto registry, mean age 67.1 and 70.5% male                                   | Excluded patients with AMI within the first week of follow-up, malignant diseases and those who died in hospital or did not have precise information on discharge prescriptions                                                                                                                                                                                           | With or without statin prescription at discharge           | CVD death           | Median 3.5 years        | Mode of revascularization, old-old age ( $\geq 75$ years), sex, BMI, smoking, hypertension, DM, PAD, CeVD, atrial fibrillation, COPD, CKD, liver cirrhosis, anemia, unstable angina, prior MI, history of CHF, TC $\geq 220$ mg/dL) or TG $\geq 150$ mg/dL, left main coronary artery disease, proximal left anterior descending artery lesion and multivessel | Cox proportional hazard model using stepwise approach and propensity scores |

|                         |                                                                                                                                                                      |                                                                                                                                                                                                                                                                                            |                                             |                                             |                  |                                                                                                                                                                                                                                                                                                         |                                                                                                                                                                    |
|-------------------------|----------------------------------------------------------------------------------------------------------------------------------------------------------------------|--------------------------------------------------------------------------------------------------------------------------------------------------------------------------------------------------------------------------------------------------------------------------------------------|---------------------------------------------|---------------------------------------------|------------------|---------------------------------------------------------------------------------------------------------------------------------------------------------------------------------------------------------------------------------------------------------------------------------------------------------|--------------------------------------------------------------------------------------------------------------------------------------------------------------------|
|                         |                                                                                                                                                                      |                                                                                                                                                                                                                                                                                            |                                             |                                             |                  | disease, and 7 potential risk reducing pharmacotherapies at hospital discharge: statins, ACE-inhibitor, ARBs, beta-blockers, antiplatelet drugs, nitrates and calcium-channel blockers                                                                                                                  |                                                                                                                                                                    |
| Herrington 2002 (53)    | 2763 postmenopausal women, mean age 67.3 years with CHD, from the HERS trial of HRT                                                                                  | Women using other lipid-lowering agents at baseline                                                                                                                                                                                                                                        | Use vs. non-use of any statin               | CHD or non-fatal MI and all-cause mortality | Mean 5.7 years   | Race, DM (according to self-report or fasting glucose >125 mg/dL), HTN (SBP $\geq$ 140 mmHg or DBP $\geq$ 90 mmHg), creatinine clearance $\geq$ 40 mL/min, LDL, HDL, prior MI, and CHF (New York Heart Association class I to III)                                                                      | Cox proportional hazard                                                                                                                                            |
| Hippisley-Cox 2005 (54) | 13029 patients with first diagnosis of AMI within the General Practitioners' Research Database in the UK                                                             | Excluded patients whose diagnosis was made within the first three months of registration with the general practice (to minimize information bias), patients prescribed statins before the diagnosis of IHD, and patients whose first diagnosis was made after death (postmortem diagnosis) | Current-users vs. never-users of any statin | All-cause death                             | Median 5.3 years | Current use of aspirin, beta blockers, and ACE-inhibitors, comorbidity (MI, DM, HTN, CHF), smoking, BMI, and quintile of deprivation                                                                                                                                                                    | Cox proportional hazard for the cohort analysis and conditional logistic regression for the nested case-control (matched on age, sex and year of diagnosis of IHD) |
| Karp 2007 (55)          | 38543 patients in Quebec, Canada discharged with a first diagnosis of AMI and linked information from drug claims database, mean age 67 years in men and 73 in women | Excluded if AMI was an in-hospital complication or a transfer from another hospital, length of stay less than 2 days, patient discharged to a long-term care institution, or moved out of province, or health care number was invalid                                                      | Continuous statin users vs. never-users     | CVD death                                   | Up to 7 years    | Age, marital status, comorbidities, use of cardiac medications at baseline and use of statins in the year preceding the index hospitalization, in-hospital procedure performed, length of hospital stay, fiscal-calendar year, specialty of treating physician and type of hospital (teaching or rural) | Cox proportional hazard model                                                                                                                                      |

|                  |                                                                                                                                                                                                                               |                                                                                                                                                                                                      |                                                       |                                    |                  |                                                                                                                                                                                                                                                                                                                                                                                     |                                                                              |
|------------------|-------------------------------------------------------------------------------------------------------------------------------------------------------------------------------------------------------------------------------|------------------------------------------------------------------------------------------------------------------------------------------------------------------------------------------------------|-------------------------------------------------------|------------------------------------|------------------|-------------------------------------------------------------------------------------------------------------------------------------------------------------------------------------------------------------------------------------------------------------------------------------------------------------------------------------------------------------------------------------|------------------------------------------------------------------------------|
| Kertai 2004 (56) | 519 patients who underwent elective abdominal aortic repair and survived 30 days after surgery, mean age 68.7 years and 86% male                                                                                              | -                                                                                                                                                                                                    | Baseline use vs. non-use of statins                   | All-cause mortality, CVD mortality | Median 4.7 years | Age, gender, beta-blockers, aspirin, angina, prior MI, heart failure, prior CVA, DM, COPD, renal function                                                                                                                                                                                                                                                                           | Cox proportional hazard model adjusting for confounders and propensity score |
| Kubota 2008 (57) | 575 consecutive Japanese patients who underwent PCI, 85% of the patients were non-obese males aged between 59 and 61 years, mean age 59.8 and 86% male                                                                        | -                                                                                                                                                                                                    | Having vs. not having a statin prescription after PCI | CVD death or all-cause mortality   | Mean 11 years    | Age, sex, BMI, smoking history, family history of CHD, TC, HDL, TG, HTN, DM, other medications, history of PCI or CABG, presentation of ACS, LVEF, vessel disease, protected left main trunk lesions, left anterior descending lesions, saphenous vein graft lesions, and procedural success (defined as residual stenosis of $\leq 50\%$ after percutaneous coronary intervention) | Cox proportional hazard model                                                |
| Kulik 2008 (58)  | 7503 Medicare patients $\geq 65$ years of age who underwent CABG (1995–2003), mean age 75.6 years and 35% male                                                                                                                | Patients who died or were readmitted to hospital within 30 days of CABG. patients who were not active users of either drug benefit program, and patients who received prescriptions for Cerivastatin | Users and initiators of statins compared to non-users | CVD event                          | 6 months         | Age, sex, race, year of surgery, PVD, preoperative stroke, previous MI or ACS, DM, postoperative beta-blocker, clopidogrel, ACE-inhibitor or ARBs use, teaching hospital, hospital volume, and surgeon volume                                                                                                                                                                       | Cox proportional hazard model                                                |
| Leeper 2007 (40) | 6107 consecutive patients seen at the Palo Alto VA Medical Center in Palo Alto, California, or 1 of 7 affiliated community clinics between 1998 and 2004 with LDL $< 60$ mg/dL, mean age 65 years and 43% with documented CHD | Patients who had no prescription within 150 days of the low LDL value                                                                                                                                | Having or not having a statin prescription            | All-cause mortality                | Mean 2 years     | Age, sex, creatinine $> 1.5$ mg/dL, LDL level, Prior malignancy, IHD, prior MI, PAD, HTN, CHF, DM, stroke, COPD, alcohol dependence, ACE-inhibitors/ARBs, beta-blockers                                                                                                                                                                                                             | Cox proportional hazard model and propensity scores adjustment               |



|                       |                                                                                                                                                                         |                                                                                                                              |                                                         |                     |                   |                                                                                                                                                                                                                                                                                                                                     |                                                                                          |
|-----------------------|-------------------------------------------------------------------------------------------------------------------------------------------------------------------------|------------------------------------------------------------------------------------------------------------------------------|---------------------------------------------------------|---------------------|-------------------|-------------------------------------------------------------------------------------------------------------------------------------------------------------------------------------------------------------------------------------------------------------------------------------------------------------------------------------|------------------------------------------------------------------------------------------|
| Muhlestein 2004 (59)  | 2924 patients from a catheterization registry between 1994 and 1996, who had significant CAD, with mean age 65 and 76% male                                             | Lack of data on CRP or statin prescription                                                                                   | Having or not having a statin prescription on discharge | All-cause mortality | Mean 2.4 years    | Age, sex, physician-reported DM, HTN and hyperlipidemia, reported family history active smokers or those with a 10 pack-year history, clinical presentation, coronary anatomy (as 1-, 2-, or 3 vessel disease). clinical interventions (medical therapy (only), PCI, CABG), history of stroke, MI, renal failure, and heart failure | Cox proportional hazard                                                                  |
| Nagashima 2007 (60)   | 4075 patients with AMI treated at 17 hospitals in Japan from 1999 to 2004, mean age 63 and 73% male                                                                     | TC > 400 mg/dL or patients died before discharge                                                                             | Having or not having a statin prescription at discharge | CVD death           | Median 4.1 years  | Age, sex, SBP, DBP, BMI, heart rate, peak CK, CRP, creatinine, HTN, hyperlipidemia, smoking, CeVD, previous MI, number of diseased vessels, PCI and CABG during hospitalization, aspirin use, ACE-inhibitor or ARB use, beta-blocker use, nitrate use, and TC                                                                       | Propensity score matching (1,404 patients included) and proportional hazard model        |
| Schanzer 2008 (61)    | 1404 patients with critical limb ischemia who underwent lower extremity bypass grafting in a randomized trial (PREVENT III), 42% had prior CHD, mean age 68.5, 64% male | Aged 18 years or more who underwent bypass grafting with autogenous vein, not having claudication as an indication for graft | having a statin prescription at discharge               | All-cause mortality | 1 year            | Age, sex, race, institutional setting, tobacco use, DM, HTN, CAD, prior CABG, CKD, prior infrainguinal bypass grafting, aspirin, beta-blocker, surgical characteristics                                                                                                                                                             | Cox proportional hazards model with backwards elimination and propensity score weighting |
| Schillinger 2004 (62) | 515 patients with advanced peripheral arterial disease, mean age 69.5 and 58% male                                                                                      | -                                                                                                                            | Use vs. non-use of statins                              | MI or death         | Median 1.75 years | Age, sex, BMI, LDL, hypertension, diabetes, smoking, history of MI, history of stroke, critical limb ischemia, Clopidogrel therapy                                                                                                                                                                                                  | Cox proportional hazard model                                                            |
| Schneeweiss 2007 (63) | Seniors age 65 years and older enrolled in both                                                                                                                         | Subjects who had had a stroke, transitory ischemic                                                                           | Having vs. not having a                                 | All-cause mortality | Max 1-year        | Age, sex, race, comorbidity score, alzheimer disease or                                                                                                                                                                                                                                                                             | Cox proportional hazard model                                                            |

|                 |                                                                                                                                  |                                                                                                                                                                                                            |                                                   |                                      |   |                                                                                                                                                                                                                                                                                                                                                                                                                                                                                                                                                                                                                                                                                                 |   |
|-----------------|----------------------------------------------------------------------------------------------------------------------------------|------------------------------------------------------------------------------------------------------------------------------------------------------------------------------------------------------------|---------------------------------------------------|--------------------------------------|---|-------------------------------------------------------------------------------------------------------------------------------------------------------------------------------------------------------------------------------------------------------------------------------------------------------------------------------------------------------------------------------------------------------------------------------------------------------------------------------------------------------------------------------------------------------------------------------------------------------------------------------------------------------------------------------------------------|---|
|                 | Medicare and the Pennsylvania Pharmaceutical Assistance Contract for the Elderly (PACE) programs between 1995 and 2002           | attack, MI, arterial surgery, or amputation for vascular disease in the past 6 months were excluded, as were those with a hospitalization for CHF, arrhythmia, or atrial fibrillation in the past 6 months | statin prescription                               |                                      |   | other dementia, angina or use of nitrates, atrial fibrillation, cancer, CVD diagnoses, cardiovascular system symptoms, cataract, chest pain, COPD, complications of heart disease, conduction disorders, coronary atherosclerosis, depression, DM, DM medication, disorders of refraction and accommodation, fracture of hip, wrist, humerus, or spine, gait abnormalities, CHF, hyperlipidemia, hyperparathyroidism, HTN, hyperthyroidism, hypothyroidism, CHD, lupus, MI, osteoarthritis, osteoporosis, palpitations, Parkinson disease, PVD, renal disease, rheumatoid arthritis, stroke, TIA, syncope, urinary tract infection, bone mineral density test, ECG, laboratory test, lipid test |   |
| Sheng 2009 (64) | 2759 patients in Tayside, Scotland, selected from primary practice database after being discharged from a hospitalization for MI | -                                                                                                                                                                                                          | Having a prescription within 30 days of discharge | All-cause mortality and recurrent MI | - | Age, sex, social deprivation category, TC change, and use of drugs (ACE-inhibitors, anticoagulants, antiplatelet agents, alpha-blockers, beta-blockers, bronchodilators, calcium channel blockers, cardiac glycosides, diuretics, disease-modifying antirheumatic drugs, nitrates, and hypoglycaemic drugs) during the follow-up period                                                                                                                                                                                                                                                                                                                                                         | - |

|                      |                                                                                                                                                                                                                                                  |                                                                                                                                                                                                                                     |                                                         |                             |                  |                                                                                                                                                                                                                                 |                                                                                       |
|----------------------|--------------------------------------------------------------------------------------------------------------------------------------------------------------------------------------------------------------------------------------------------|-------------------------------------------------------------------------------------------------------------------------------------------------------------------------------------------------------------------------------------|---------------------------------------------------------|-----------------------------|------------------|---------------------------------------------------------------------------------------------------------------------------------------------------------------------------------------------------------------------------------|---------------------------------------------------------------------------------------|
| Stenstrand 2001 (65) | 19599 patients with a first MI and less than 80 years old from the Swedish Register of Cardiac Intensive Care from 1995 to 1998, mean age 65.5 and 71% male                                                                                      | Patients with incomplete data or those who died before hospital discharge                                                                                                                                                           | Having or not having a statin prescription at discharge | All-cause mortality         | Up to 1-year     | 42 covariates including age, sex, smoking, previous MI, previous PCI or CABG, history of DM, history of HTN, circulatory arrest, medication use, type and size of hospital, admission year, hospital's statin prescription rate | Cox proportional hazard adjusted for propensity scores                                |
| Ward 2005 (66)       | 446 patients who underwent infrainguinal vascular bypass surgery, mean age 67 and 51% men, 59% had CAD                                                                                                                                           | Surgeries for which the indication was not atherosclerotic peripheral vascular disease (trauma, gunshot wound, congenital vascular malformation, or vascular infiltration of tumor)                                                 | Baseline use vs. non-use of statins                     | All-cause mortality         | Mean 5.5 years   | Age, CAD, beta-blocker use, ESRD, operative year, HTN, DM, and an operative indication of limb salvage                                                                                                                          | Cox proportional hazard model                                                         |
| Weiner 2008 (67)     | 4151 patients with history of MI and/or angina and total cholesterol >210 mg/dL in the General Practitioners' Research Database in UK, males 35-70 years old and females 45-70 years old, 63.2% male                                             | AMI in the past 6 months, history of CVA, heart failure requiring treatment, impaired hepatic function, valvular heart disease, altered hemodynamics, history of drug or alcohol abuse, poor mental function, other serious disease | Initiator vs. non-initiator of any statins              | Recurrent MI                | Median 5.4 years | Age, sex, SBP, BMI, smoking, previous MI, angina and/or other IHD and/or nitrate therapy, prior coronary revascularization, TIA and/or other ischemic CeVD, DM, and/or DM treatment                                             | Cox proportional hazard model (Results were the same using propensity score analysis) |
| Welten 2007 (68)     | 2126 patients who were referred for elective open infrarenal abdominal aortic surgery or lower limb arterial revascularization procedures, mean age 66 years and 76% male, 29% had MI, 26% revascularization and 17% angina pectoris at baseline | -                                                                                                                                                                                                                                   | Perioperative use vs. non-use of statins                | All-cause and CVD mortality | Mean 6 years     | Age, sex, HTN, DM, smoking, hypercholesterolemia, COPD, BMI, type of surgery, history of MI, coronary, revascularization, heart failure, angina, CeVD, and year of operation                                                    | Cox proportional hazard model adjusting for confounders and propensity score          |

|                 |                                                                                                                                                          |                                                                                                                                              |                                             |                     |                   |                                                                                                                                                                                                                                                                                   |                                                          |
|-----------------|----------------------------------------------------------------------------------------------------------------------------------------------------------|----------------------------------------------------------------------------------------------------------------------------------------------|---------------------------------------------|---------------------|-------------------|-----------------------------------------------------------------------------------------------------------------------------------------------------------------------------------------------------------------------------------------------------------------------------------|----------------------------------------------------------|
| Zhang 2007 (69) | 201102 individuals who used a Veteran Health Administration facility at least once in FY96 to FY98 and who had diabetes based on claims criterion        | Patients who either had incomplete medication data files or that did not perform hemoglobin A1c tests using validated laboratory methodology | Having vs. not having a statin prescription | All-cause mortality | Up to 2-2.5 years | Age, sex, ethnicity, CHF, IHD, PVD, any mental health condition, HTN, hyperlipidemia, renal disease, ACE-inhibitor use, beta-blockers, calcium channel blockers, insulin, mean HbA1c, mean creatinine, mean TC, mean LDL, Charlson score, total inpatient days                    | Propensity score matched conditional logistic regression |
| Zhang 2009 (70) | 3227 patients who underwent PCI and were taken from two rounds of the National Heart, Lung and Blood Institute Dynamic Registry. Mean age 63.8, 67% male | Patients with cardiogenic shock, in-hospital adverse events (including MI or CABG), liver disease, renal disease, alcoholism or drug abuse   | Having vs. not having a statin prescription | All-cause mortality | 1 year            | Age, sex, race, enrollment wave, insurance, BMI, disease history, procedure indication, procedure circumstance, use of drug-eluting stent, LVEF, periprocedural glycoprotein IIb/IIIa inhibitor, single/double/triple vessel disease, number of lesions, medications at discharge | Propensity score adjusted Cox regression                 |

## Abbreviations:

|                                             |                                                    |                                                      |
|---------------------------------------------|----------------------------------------------------|------------------------------------------------------|
| ACE: angiotensin converting enzyme          | CRF: chronic renal failure                         | LVH: left ventricular hypertrophy                    |
| ACS: Acute coronary syndrome                | CRP: C-reactive protein                            | MI: myocardial infarction                            |
| ALT: alanine aminotransferase               | CVA: Cerebrovascular accident                      | NYHA: New York Heart Association                     |
| AMI: acute myocardial infarction            | CVD: cardiovascular disease                        | PAD: peripheral arterial disease                     |
| AMI: acute myocardial infarction            | DBP: diastolic blood pressure                      | PCI: percutaneous coronary intervention              |
| ARB: angiotensin II receptor blocker        | DM: diabetes mellitus                              | PTCA: percutaneous transluminal coronary angioplasty |
| AST: aspartate aminotransferase             | ECG: electrocardiogram                             | PVD : peripheral vascular disease                    |
| BMI: body mass index                        | ESRD: end-stage renal disease                      | SBP: systolic blood pressure                         |
| CABG: coronary artery bypass graft          | HDL: high-density lipoprotein                      | SES: socioeconomic status                            |
| CAD: coronary artery disease                | HRT: hormone replacement therapy (post-menopausal) | TG: (serum) triglycerides                            |
| CeVD: cerebrovascular disease               | HTN: hypertension                                  | TIA: transient ischemic attack                       |
| CHD: coronary heart disease                 | IFG: impaired fasting glucose                      | UK: United Kingdom                                   |
| CHF: congestive heart failure               | IHD: ischemic heart disease                        | WBC: white blood cell count                          |
| CK: creatine phosphokinase                  | LDL: low-density lipoprotein                       |                                                      |
| CKD: chronic kidney disease                 | LV: left ventricle                                 |                                                      |
| COPD: chronic obstructive pulmonary disease | LVEF: left ventricular ejection fraction           |                                                      |

## References

1. Furberg CD, Adams HP, Jr., Applegate WB, et al. Effect of lovastatin on early carotid atherosclerosis and cardiovascular events. Asymptomatic Carotid Artery Progression Study (ACAPS) Research Group. *Circulation*. 1994;90(4):1679-87.
2. Downs JR, Clearfield M, Weis S, et al. Primary prevention of acute coronary events with lovastatin in men and women with average cholesterol levels: results of AFCAPS/TexCAPS. Air Force/Texas Coronary Atherosclerosis Prevention Study. *JAMA*. 1998;279(20):1615-22.
3. Major outcomes in moderately hypercholesterolemic, hypertensive patients randomized to pravastatin vs usual care: The Antihypertensive and Lipid-Lowering Treatment to Prevent Heart Attack Trial (ALLHAT-LLT). *JAMA*. 2002;288(23):2998-3007.
4. Sever PS, Dahlof B, Poulter NR, et al. Prevention of coronary and stroke events with atorvastatin in hypertensive patients who have average or lower-than-average cholesterol concentrations, in the Anglo-Scandinavian Cardiac Outcomes Trial--Lipid Lowering Arm (ASCOT-LLA): a multicentre randomised controlled trial. *Lancet*. 2003;361(9364):1149-58.
5. Knopp RH, d'Emden M, Smilde JG, et al. Efficacy and safety of atorvastatin in the prevention of cardiovascular end points in subjects with type 2 diabetes: the Atorvastatin Study for Prevention of Coronary Heart Disease Endpoints in non-insulin-dependent diabetes mellitus (ASPEN). *Diabetes Care*. 2006;29(7):1478-85.
6. Hedblad B, Wikstrand J, Janzon L, et al. Low-dose metoprolol CR/XL and fluvastatin slow progression of carotid intima-media thickness: Main results from the Beta-Blocker Cholesterol-Lowering Asymptomatic Plaque Study (BCAPS). *Circulation*. 2001;103(13):1721-6.
7. Mercuri M, Bond MG, Sirtori CR, et al. Pravastatin reduces carotid intima-media thickness progression in an asymptomatic hypercholesterolemic mediterranean population: the Carotid Atherosclerosis Italian Ultrasound Study. *Am J Med*. 1996;101(6):627-34.
8. Colhoun HM, Betteridge DJ, Durrington PN, et al. Primary prevention of cardiovascular disease with atorvastatin in type 2 diabetes in the Collaborative Atorvastatin Diabetes Study (CARDS): multicentre randomised placebo-controlled trial. *Lancet*. 2004;364(9435):685-96.
9. Sawayama Y, Shimizu C, Maeda N, et al. Effects of probucol and pravastatin on common carotid atherosclerosis in patients with asymptomatic hypercholesterolemia. Fukuoka Atherosclerosis Trial (FAST). *J Am Coll Cardiol*. 2002;39(4):610-6.
10. Anderssen SA, Hjelstuen AK, Hjermann I, et al. Fluvastatin and lifestyle modification for reduction of carotid intima-media thickness and left ventricular mass progression in drug-treated hypertensives. *Atherosclerosis*. 2005;178(2):387-97.
11. Ridker PM, Danielson E, Fonseca FA, et al. Rosuvastatin to prevent vascular events in men and women with elevated C-reactive protein. *N Engl J Med*. 2008;359(21):2195-207.
12. Salonen R, Nyyssonen K, Porkkala E, et al. Kuopio Atherosclerosis Prevention Study (KAPS). A population-based primary preventive trial of the effect of LDL lowering on atherosclerotic progression in carotid and femoral arteries. *Circulation*. 1995;92(7):1758-64.

13. Nakamura H, Arakawa K, Itakura H, et al. Primary prevention of cardiovascular disease with pravastatin in Japan (MEGA Study): a prospective randomised controlled trial. *Lancet*. 2006;368(9542):1155-63.
14. Shepherd J, Cobbe SM, Ford I, et al. Prevention of coronary heart disease with pravastatin in men with hypercholesterolemia. West of Scotland Coronary Prevention Study Group. *N Engl J Med*. 1995;333(20):1301-7.
15. Randomised trial of cholesterol lowering in 4444 patients with coronary heart disease: the Scandinavian Simvastatin Survival Study (4S). *Lancet*. 1994;344(8934):1383-9.
16. Koren MJ, Hunninghake DB. Clinical outcomes in managed-care patients with coronary heart disease treated aggressively in lipid-lowering disease management clinics: the alliance study. *J Am Coll Cardiol*. 2004;44(9):1772-9.
17. Yokoi H, Nobuyoshi M, Mitsudo K, et al. Three-year follow-up results of angiographic intervention trial using an HMG-CoA reductase inhibitor to evaluate retardation of obstructive multiple atheroma (ATHEROMA) study. *Circ J*. 2005;69(8):875-83.
18. Flaker GC, Warnica JW, Sacks FM, et al. Pravastatin prevents clinical events in revascularized patients with average cholesterol concentrations. Cholesterol and Recurrent Events CARE Investigators. *J Am Coll Cardiol*. 1999;34(1):106-12.
19. Waters D, Higginson L, Gladstone P, et al. Effects of monotherapy with an HMG-CoA reductase inhibitor on the progression of coronary atherosclerosis as assessed by serial quantitative arteriography. The Canadian Coronary Atherosclerosis Intervention Trial. *Circulation*. 1994;89(3):959-68.
20. Colivicchi F, Guido V, Tubaro M, et al. Effects of atorvastatin 80 mg daily early after onset of unstable angina pectoris or non-Q-wave myocardial infarction. *Am J Cardiol*. 2002;90(8):872-4.
21. Ostadal P, Alan D, Vejvoda J, et al. Fluvastatin in the first-line therapy of acute coronary syndrome: results of the multicenter, randomized, double-blind, placebo-controlled trial (the FACS-trial). *Trials*. 2010;11:61.
22. Results of the low-dose (20 mg) pravastatin GISSI Prevenzione trial in 4271 patients with recent myocardial infarction: do stopped trials contribute to overall knowledge? GISSI Prevenzione Investigators (Gruppo Italiano per lo Studio della Sopravvivenza nell'Infarto Miocardico). *Ital Heart J*. 2000;1(12):810-20.
23. MRC/BHF Heart Protection Study of cholesterol lowering with simvastatin in 20,536 high-risk individuals: a randomised placebo-controlled trial. *Lancet*. 2002;360(9326):7-22.
24. Long-term effectiveness and safety of pravastatin in 9014 patients with coronary heart disease and average cholesterol concentrations: the LIPID trial follow-up. *Lancet*. 2002;359(9315):1379-87.
25. Serruys PW, de Feyter P, Macaya C, et al. Fluvastatin for prevention of cardiac events following successful first percutaneous coronary intervention: a randomized controlled trial. *JAMA*. 2002;287(24):3215-22.
26. Riegger G, Abletshauser C, Ludwig M, et al. The effect of fluvastatin on cardiac events in patients with symptomatic coronary artery disease during one year of treatment. *Atherosclerosis*. 1999;144(1):263-70.
27. Effect of simvastatin on coronary atheroma: the Multicentre Anti-Atheroma Study (MAAS). *Lancet*. 1994;344(8923):633-8.

28. Blankenhorn DH, Azen SP, Krams DM, et al. Coronary angiographic changes with lovastatin therapy. The Monitored Atherosclerosis Regression Study (MARS). *Ann Intern Med.* 1993;119(10):969-76.
29. Nakagawa T, Kobayashi T, Awata N, et al. Randomized, controlled trial of secondary prevention of coronary sclerosis in normocholesterolemic patients using pravastatin: final 5-year angiographic follow-up of the Prevention of Coronary Sclerosis (PCS) study. *Int J Cardiol.* 2004;97(1):107-14.
30. Sato H, Kinjo K, Ito H, et al. Effect of early use of low-dose pravastatin on major adverse cardiac events in patients with acute myocardial infarction: the OACIS-LIPID Study. *Circ J.* 2008;72(1):17-22.
31. Petronio AS, Amoroso G, Limbruno U, et al. Simvastatin does not inhibit intimal hyperplasia and restenosis but promotes plaque regression in normocholesterolemic patients undergoing coronary stenting: a randomized study with intravascular ultrasound. *Am Heart J.* 2005;149(3):520-6.
32. Furberg CD, Pitt B, Byington RP, et al. Reduction in coronary events during treatment with pravastatin. PLAC I and PLAC II Investigators. Pravastatin Limitation of Atherosclerosis in the Coronary Arteries. *Am J Cardiol.* 1995;76(9):60C-3C.
33. Shepherd J, Blauw GJ, Murphy MB, et al. Pravastatin in elderly individuals at risk of vascular disease (PROSPER): a randomised controlled trial. *Lancet.* 2002;360(9346):1623-30.
34. Jukema JW, Bruschke AV, van Boven AJ, et al. Effects of lipid lowering by pravastatin on progression and regression of coronary artery disease in symptomatic men with normal to moderately elevated serum cholesterol levels. The Regression Growth Evaluation Statin Study (REGRESS). *Circulation.* 1995;91(10):2528-40.
35. Teo KK, Burton JR, Buller CE, et al. Long-term effects of cholesterol lowering and angiotensin-converting enzyme inhibition on coronary atherosclerosis: The Simvastatin/Enalapril Coronary Atherosclerosis Trial (SCAT). *Circulation.* 2000;102(15):1748-54.
36. Amarenco P, Bogousslavsky J, Callahan A, 3rd, et al. High-dose atorvastatin after stroke or transient ischemic attack. *N Engl J Med.* 2006;355(6):549-59.
37. Seeger JD, Walker AM, Williams PL, et al. A propensity score-matched cohort study of the effect of statins, mainly fluvastatin, on the occurrence of acute myocardial infarction. *Am J Cardiol.* 2003;92(12):1447-51.
38. Seeger JD, Williams PL, Walker AM. An application of propensity score matching using claims data. *Pharmacoepidemiol Drug Saf.* 2005;14(7):465-76.
39. Smeeth L, Douglas I, Hall AJ, et al. Effect of statins on a wide range of health outcomes: a cohort study validated by comparison with randomized trials, an application of propensity score matching using claims data. *Br J Clin Pharmacol.* 2009;67(1):99-109.
40. Leeper NJ, Ardehali R, deGoma EM, et al. Statin use in patients with extremely low low-density lipoprotein levels is associated with improved survival. *Circulation.* 2007;116(6):613-8.
41. Lemaitre RN, Psaty BM, Heckbert SR, et al. Therapy with hydroxymethylglutaryl coenzyme a reductase inhibitors (statins) and associated risk of incident cardiovascular events in older adults: evidence from the Cardiovascular Health Study. *Arch Intern Med.* 2002;162(12):1395-400.



42. Gardette V, Bongard V, Dallongeville J, et al. Ten-year all-cause mortality in presumably healthy subjects on lipid-lowering drugs (from the Prospective Epidemiological Study of Myocardial Infarction [PRIME] prospective cohort). *Am J Cardiol.* 2009;103(3):381-6.
43. Allen Maycock CA, Muhlestein JB, Horne BD, et al. Statin therapy is associated with reduced mortality across all age groups of individuals with significant coronary disease, including very elderly patients. *J Am Coll Cardiol.* 2002;40(10):1777-85.
44. Carrier M, Cossette M, Pellerin M, et al. Statin treatment equalizes long-term survival between patients with single and bilateral internal thoracic artery grafts. *Ann Thorac Surg.* 2009;88(3):789-95; discussion 95.
45. Christensen S, Thomsen RW, Johansen MB, et al. Preadmission statin use and one-year mortality among patients in intensive care - a cohort study. *Crit Care.* 2010;14(2):R29.
46. Cooke CA, Kirkland SA, Sketris IS, et al. The impact of statins on health services utilization and mortality in older adults discharged from hospital with ischemic heart disease: a cohort study. *BMC Health Serv Res.* 2009;9:198.
47. de Liefde II, Hoeks SE, van Gestel YR, et al. Usefulness of hypertensive blood pressure response during a single-stage exercise test to predict long-term outcome in patients with peripheral arterial disease. *Am J Cardiol.* 2008;102(7):921-6.
48. De Luca G, Suryapranata H, Ottervanger JP, et al. Impact of statin therapy at discharge on 1-year mortality in patients with ST-segment elevation myocardial infarction treated with primary angioplasty. *Atherosclerosis.* 2006;189(1):186-92.
49. Fintel D, Joyce A, Mackell J, et al. Reduced mortality rates after intensive statin therapy in managed-care patients. *Value Health.* 2007;10(2):161-9.
50. Feringa HH, Bax JJ, Karagiannis SE, et al. Elderly patients undergoing major vascular surgery: risk factors and medication associated with risk reduction. *Arch Gerontol Geriatr.* 2009;48(1):116-20.
51. Foody JM, Rathore SS, Galusha D, et al. Hydroxymethylglutaryl-CoA reductase inhibitors in older persons with acute myocardial infarction: evidence for an age-statin interaction. *J Am Geriatr Soc.* 2006;54(3):421-30.
52. Furukawa Y, Taniguchi R, Ehara N, et al. Better survival with statin administration after revascularization therapy in Japanese patients with coronary artery disease: perspectives from the CREDO-Kyoto registry. *Circ J.* 2008;72(12):1937-45.
53. Herrington DM, Vittinghoff E, Lin F, et al. Statin therapy, cardiovascular events, and total mortality in the Heart and Estrogen/Progestin Replacement Study (HERS). *Circulation.* 2002;105(25):2962-7.
54. Hippisley-Cox J, Coupland C. Effect of combinations of drugs on all cause mortality in patients with ischaemic heart disease: nested case-control analysis. *BMJ.* 2005;330(7499):1059-63.
55. Karp I, Chen SF, Pilote L. Sex differences in the effectiveness of statins after myocardial infarction. *CMAJ.* 2007;176(3):333-8.
56. Kertai MD, Boersma E, Westerhout CM, et al. Association between long-term statin use and mortality after successful abdominal aortic aneurysm surgery. *Am J Med.* 2004;116(2):96-103.
57. Kubota N, Kasai T, Miyauchi K, et al. Therapy with statins and aspirin enhances long-term outcome of percutaneous coronary intervention. *Heart Vessels.* 2008;23(1):35-9.
58. Kulik A, Brookhart MA, Levin R, et al. Impact of statin use on outcomes after coronary artery bypass graft surgery. *Circulation.* 2008;118(18):1785-92.

59. Muhlestein JB, Anderson JL, Horne BD, et al. Early effects of statins in patients with coronary artery disease and high C-reactive protein. *Am J Cardiol.* 2004;94(9):1107-12.
60. Nagashima M, Koyanagi R, Kasanuki H, et al. Effect of early statin treatment at standard doses on long-term clinical outcomes in patients with acute myocardial infarction (the Heart Institute of Japan, Department of Cardiology Statin Evaluation Program). *Am J Cardiol.* 2007;99(11):1523-8.
61. Schanzer A, Hevelone N, Owens CD, et al. Statins are independently associated with reduced mortality in patients undergoing infrainguinal bypass graft surgery for critical limb ischemia. *Journal of Vascular Surgery.* 2008;47(4):774-81.e1.
62. Schillinger M, Exner M, Mlekusch W, et al. Statin therapy improves cardiovascular outcome of patients with peripheral artery disease. *Eur Heart J.* 2004;25(9):742-8.
63. Schneeweiss S, Patrick AR, Sturmer T, et al. Increasing levels of restriction in pharmacoepidemiologic database studies of elderly and comparison with randomized trial results. *Med Care.* 2007;45(10 Supl 2):S131-42.
64. Sheng X, Wei L, Murphy MJ, et al. Statins and total (not LDL) cholesterol concentration and outcome of myocardial infarction: results from a meta-analysis and an observational study. *Eur J Clin Pharmacol.* 2009;65(11):1071-80.
65. Stenestrand U, Wallentin L. Early statin treatment following acute myocardial infarction and 1-year survival. *JAMA.* 2001;285(4):430-6.
66. Ward RP, Leeper NJ, Kirkpatrick JN, et al. The effect of preoperative statin therapy on cardiovascular outcomes in patients undergoing infrainguinal vascular surgery. *Int J Cardiol.* 2005;104(3):264-8.
67. Weiner MG, Xie D, Tannen RL. Replication of the Scandinavian Simvastatin Survival Study using a primary care medical record database prompted exploration of a new method to address unmeasured confounding. *Pharmacoepidemiol Drug Saf.* 2008;17(7):661-70.
68. Welten GM, Chonchol M, Hoeks SE, et al. Statin therapy is associated with improved outcomes in vascular surgery patients with renal impairment. *Am Heart J.* 2007;154(5):954-61.
69. Zhang Q, Safford M, Miller D, et al. Short-term statin exposure is associated with reduced all-cause mortality in persons with diabetes. *Med Care.* 2007;45(4):308-14.
70. Zhang ZJ, Marroquin OC, Weissfeld JL, et al. Beneficial effects of statins after percutaneous coronary intervention. *Eur J Cardiovasc Prev Rehabil.* 2009;16(4):445-50.
